# Supplementary material
Source: PubMed Central journal article supplement (PMC8045457)
Supplement: NIHMS1690020-supplement-SI.pdf [file NIHMS1690020-supplement-SI.pdf]

# SUPPORTING INFORMATION

FOR

## **Metabolite Structure Assignment Using *in silico* NMR Techniques.**

Susanta Das<sup>a</sup>, Arthur S. Edison<sup>b</sup>, Kenneth M. Merz, Jr.<sup>a,\*</sup>

<sup>a</sup>Department of Chemistry, Michigan State University, 578 S. Shaw Lane, East Lansing, Michigan 48824, USA.

<sup>b</sup>Departments of Genetics and Biochemistry, Institute of Bioinformatics and Complex Carbohydrate Center, University of Georgia, 315 Riverbend Rd, Athens, GA 30602, USA.

\*E-mail (Kenneth M. Merz, Jr.): [merzjrke@msu.edu](mailto:merzjrke@msu.edu)

## Table of Contents

**Table S1.** Scaling parameters for the  $^1\text{H}$  and  $^{13}\text{C}$  chemical shifts derived from the linear regression method.

**Table S2.** The relative Gibbs free energy (in kcal mol $^{-1}$ ) of each conformer with respect to the most stable structure, Boltzmann distribution of conformers and the Boltzmann mole fraction (in %) for each conformer of L- citrulline.

**Table S3.** Relative energies, Boltzmann factor and Equilibrium mole fraction of all structurally distinct conformations of O-succinyl-L- homoserine.

**Table S4.** The relative Gibbs free energy (in kcal mol $^{-1}$ ) of each conformer with respect to the most stable structure, Boltzmann distribution of conformers and the Boltzmann mole fraction (in %) for each conformer of 4-hydroxyphenethyl-alcohol.

**Table S5.** The relative Gibbs free energy (in kcal mol $^{-1}$ ) of each conformer with respect to the most stable structure, Boltzmann distribution of conformers and the Boltzmann mole fraction (in %) for each conformer of N-acetyl-D-glucosamine.

**Table S6.** The relative Gibbs free energy (in kcal mol $^{-1}$ ) of each conformer with respect to the most stable structure, Boltzmann distribution of conformers and the Boltzmann mole fraction (in %) for each conformer of N-acetylneuraminic-acid.

**Table S7.** The relative Gibbs free energy (in kcal mol $^{-1}$ ) of each conformer with respect to the most stable structure, Boltzmann distribution of conformers and the Boltzmann mole fraction (in %) for each conformer of Salicylate.

**Table S8.** The relative Gibbs free energy (in kcal mol $^{-1}$ ) of each conformer with respect to the most stable structure, Boltzmann distribution of conformers and the Boltzmann mole fraction (in %) for each conformer of Kanamycin.

**Table S9.** The relative Gibbs free energy (in kcal mol $^{-1}$ ) of each conformer with respect to the most stable structure, Boltzmann distribution of conformers and the Boltzmann mole fraction (in %) for each conformer of Methyl-N-acetyl-alpha-D-glucosaminide.

**Table S10.** The relative Gibbs free energy (in kcal mol $^{-1}$ ) of each conformer with respect to the most stable structure, Boltzmann distribution of conformers and the Boltzmann mole fraction (in %) for each conformer of Pantothenate.

**Table S11.** The relative Gibbs free energy (in kcal mol $^{-1}$ ) of each conformer with respect to the most stable structure, Boltzmann distribution of conformers and the Boltzmann mole fraction (in %) for each conformer of Choline.

**Table S12.** Computed and experimental  $^1\text{H}$  NMR chemical shift (in ppm) data of L-citrulline.

**Table S13.** Computed and experimental  $^{13}\text{C}$  NMR chemical shift (in ppm) data of L-citrulline.

**Table S14.** Computed and available experimental  $^1\text{H}$  NMR shifts for O-succinyl-L- homoserine.

**Table S15.** Computed and available experimental  $^{13}\text{C}$  NMR chemical shifts for O-succinyl-L- homoserine.

**Table S16.** Computed and experimental  $^1\text{H}$  NMR chemical shift (in ppm) data of 4-hydroxyphenethyl-alcohol.

**Table S17.** Computed and experimental  $^{13}\text{C}$  NMR chemical shift (in ppm) data of 4-hydroxyphenethyl-alcohol.

**Table S18.** Computed and experimental  $^1\text{H}$  NMR chemical shift (in ppm) data of N-acetyl-D-glucosamine.

**Table S19.** Computed and experimental  $^{13}\text{C}$  NMR chemical shift (in ppm) data of N-acetyl-D-glucosamine.

**Table S20.** Computed and experimental  $^1\text{H}$  NMR chemical shift (in ppm) data of N-acetylneuraminic-acid.

**Table S21.** Computed and experimental  $^{13}\text{C}$  NMR chemical shift (in ppm) data of N-acetylneuraminic-acid.

**Table S22.** Computed and experimental  $^1\text{H}$  NMR chemical shift (in ppm) data of Salicylate.

**Table S23.** Computed and experimental  $^{13}\text{C}$  NMR chemical shift (in ppm) data of Salicylate.

**Table S24.** Computed and experimental  $^1\text{H}$  NMR chemical shift (in ppm) data of Kanamycin.

**Table S25.** Computed and experimental  $^{13}\text{C}$  NMR chemical shift (in ppm) data of Kanamycin.

**Table S26.** Computed and experimental  $^1\text{H}$  NMR chemical shift (in ppm) data of Methyl-N-acetyl-alpha-D-glucosaminide.

**Table S27.** Computed and experimental  $^{13}\text{C}$  NMR chemical shift (in ppm) data of Methyl-N-acetyl-alpha-D-glucosaminide.

**Table S28.** Computed and experimental  $^1\text{H}$  NMR chemical shift (in ppm) data of Pantothenate.

**Table S29.** Computed and experimental  $^{13}\text{C}$  NMR chemical shift (in ppm) data of Pantothenate.

**Table S30.** Computed and experimental  $^1\text{H}$  NMR chemical shift (in ppm) data of Choline.

**Table S31.** Computed and experimental  $^{13}\text{C}$  NMR chemical shift (in ppm) data of Choline.

**Table S32.** No. of atoms, No. of rotatable bonds, Force-field generated conformation, ANI optimized conformations, and No. of Cluster are reported.

**Table S33.** Relative energies, Boltzmann factor and Equilibrium mole fraction of all structurally distinct conformations of O-succinyl-L- homoserine (zwitterionic state)

**Table S34.** The relative Gibbs free energy (in kcal mol $^{-1}$ ) of each conformer with respect to the most stable structure, Boltzmann distribution of conformers and the Boltzmann mole fraction (in %) for each conformer of L- citrulline (zwitterionic form).

**Table S35.** The relative Gibbs free energy (in kcal mol $^{-1}$ ) of each conformer with respect to the most stable structure, Boltzmann distribution of conformers and the Boltzmann mole fraction (in %) for each conformer of N-acetylneuraminic-acid (anionic form).

**Table S36.** Computed and available experimental  $^{13}\text{C}$  NMR chemical shifts for O-succinyl-L- homoserine (zwitterionic state)

**Table S37.** Computed and available experimental  $^{13}\text{C}$  NMR chemical shifts for O-succinyl-L- homoserine (zwitterionic state)

**Table S38.** Computed and experimental  $^1\text{H}$  NMR chemical shift (in ppm) data of L-citrulline (zwitterionic form)

**Table S39.** Computed and experimental  $^{13}\text{C}$  NMR chemical shift (in ppm) data of L-citrulline (zwitterionic form).

**Table S40.** Computed and experimental  $^1\text{H}$  NMR chemical shift (in ppm) data of N-acetylneuraminic-acid (anionic form).

**Table S41.** Computed and experimental  $^{13}\text{C}$  NMR chemical shift (in ppm) data of N-acetylneuraminic-acid (anionic form).

**Table S42.** Computed and experimental  $^1\text{H}$  NMR chemical shift (in ppm) data of Salicylate (anionic form).

**Table S43.** Computed and experimental  $^{13}\text{C}$  NMR chemical shift (in ppm) data of Salicylate (anionic form).

**Table S44.** MAE values of the  $^1\text{H}$  and  $^{13}\text{C}$  NMR chemical shifts.

**Figure S1.** Plots of the differences between the calculated and experimental  $^1\text{H}$  and  $^{13}\text{C}$  NMR chemical shifts of L- citrulline. Shielding constants were computed at the B3LYP/6311G+(2d, p) level of theory and converted to linear scaled reference chemical shifts. Values of chemical shift differences are given in ppm.

**Figure S2.** Plots of the differences between the calculated and experimental  $^1\text{H}$  and  $^{13}\text{C}$  NMR chemical shifts of 4-hydroxyphenethyl-alcohol. Shielding constants were computed at the B3LYP/6311G+(2d, p) level of theory and converted to linear scaled reference chemical shifts. Values of chemical shift differences are given in ppm.

**Figure S3.** Plots of the differences between the calculated and experimental  $^1\text{H}$  and  $^{13}\text{C}$  NMR chemical shifts of N-acetyl-D-glucosamine. Shielding constants were computed at the B3LYP/6311G+(2d, p) level of theory and converted to linear scaled reference chemical shifts. Values of chemical shift differences are given in ppm.

**Figure S4.** Plots of the differences between the calculated and experimental  $^1\text{H}$  and  $^{13}\text{C}$  NMR chemical shifts of N-acetylneuraminic-acid. Shielding constants were computed at the B3LYP/6311G+(2d, p) level of theory and converted to linear scaled reference chemical shifts. Values of chemical shift differences are given in ppm.

**Figure S5.** Plots of the differences between the calculated and experimental  $^1\text{H}$  and  $^{13}\text{C}$  NMR chemical shifts of Salicylate. Shielding constants were computed at the B3LYP/6311G+(2d, p) level of theory and converted to linear scaled reference chemical shifts. Values of chemical shift differences are given in ppm.

**Figure S6.** Plots of the differences between the calculated and experimental  $^1\text{H}$  and  $^{13}\text{C}$  NMR chemical shifts of Kanamycin. Shielding constants were computed at the B3LYP/6311G+(2d, p) level of theory and converted to linear scaled reference chemical shifts. Values of chemical shift differences are given in ppm.

**Figure S7.** Plots of the differences between the calculated and experimental  $^1\text{H}$  and  $^{13}\text{C}$  NMR chemical shifts of Methyl-N-acetyl-alpha-D-glucosaminide. Shielding constants were computed at the B3LYP/6311G+(2d, p) level of theory and converted to linear scaled reference chemical shifts. Values of chemical shift differences are given in ppm.

**Figure S8.** Plots of the differences between the calculated and experimental  $^1\text{H}$  and  $^{13}\text{C}$  NMR chemical shifts of Pantothenate. Shielding constants were computed at the B3LYP/6311G+(2d, p) level of theory and converted to linear scaled reference chemical shifts. Values of chemical shift differences are given in ppm.

**Figure S9.** Plots of the differences between the calculated and experimental  $^1\text{H}$  and  $^{13}\text{C}$  NMR chemical shifts of Choline. Shielding constants were computed at the B3LYP/6311G+(2d, p) level of theory and converted to linear scaled reference chemical shifts. Values of chemical shift differences are given in ppm.

**Figure S10.** Plots of the differences between the calculated and experimental  $^1\text{H}$  and  $^{13}\text{C}$  NMR chemical shifts of O-succinyl-L-homoserine (zwitterionic form in the solvent,  $\text{D}_2\text{O}$ ). Shielding constants were computed at the B3LYP/6311G+(2d, p) level of theory and converted to linear scaled reference chemical shifts. Values of chemical shift differences are given in ppm.

**Figure S11.** Plots of the differences between the calculated and experimental  $^1\text{H}$  and  $^{13}\text{C}$  NMR chemical shifts of L- citrulline (zwitterionic form). Shielding constants were computed at the B3LYP/6311G+(2d, p) level of theory and converted to linear scaled reference chemical shifts. Values of chemical shift differences are given in ppm.

**Figure S12.** Plots of the differences between the calculated and experimental  $^1\text{H}$  and  $^{13}\text{C}$  NMR chemical shifts of N-acetylneuraminic-acid (anionic form). Shielding constants were computed at the B3LYP/6311G+(2d, p) level of theory and converted to linear scaled reference chemical shifts. Values of chemical shift differences are given in ppm.

**Figure S13.** Plots of the differences between the calculated and experimental  $^1\text{H}$  and  $^{13}\text{C}$  NMR chemical shifts of Salicylate (anionic form). Shielding constants were computed at the B3LYP/6311G+(2d, p) level of theory and converted to linear scaled reference chemical shifts. Values of chemical shift differences are given in ppm.

Table S 1. Scaling parameters for the  $^1\text{H}$  and  $^{13}\text{C}$  chemical shifts derived from the linear regression method.

|                 | Scaling factors |           |
|-----------------|-----------------|-----------|
|                 | Slope           | Intercept |
| $^1\text{H}$    | -1.0767         | 31.9477   |
| $^{13}\text{C}$ | -1.0522         | 181.2412  |

Table S 2. The relative Gibbs free energy (in kcal mol $^{-1}$ ) of each conformer with respect to the most stable structure, Boltzmann distribution of conformers and the Boltzmann mole fraction (in %) for each conformer of L- citrulline.

| Conf. No. | Relative energy (kcal mol $^{-1}$ ) | Boltzmann factor | Eq. mole fraction (%) |
|-----------|-------------------------------------|------------------|-----------------------|
| 1         | 1.39                                | 0.095            | 5.56                  |
| 2         | 3.28                                | 0.004            | 0.23                  |
| 3         | 1.07                                | 0.164            | 9.55                  |
| 4         | 1.56                                | 0.072            | 4.18                  |
| 5         | 1.83                                | 0.046            | 2.66                  |
| 6         | 1.87                                | 0.043            | 2.48                  |
| 7         | 1.45                                | 0.087            | 5.04                  |
| 8         | 3.13                                | 0.005            | 0.30                  |
| 9         | 3.36                                | 0.003            | 0.20                  |
| 10        | 1.69                                | 0.058            | 3.37                  |
| 11        | 1.18                                | 0.136            | 7.89                  |
| 12        | 5.59                                | 0.000            | 0.00                  |
| 13        | 0.00                                | 1.000            | 58.23                 |
| 14        | 3.67                                | 0.002            | 0.12                  |
| 15        | 3.43                                | 0.003            | 0.18                  |

Table S 3. Relative energies, Boltzmann factor and Equilibrium mole fraction of all structurally distinct conformations of O-succinyl-L- homoserine.

| Conf. No. | Relative energy (kcal) | Boltzmann factor | Eq. mole fraction (%) |
|-----------|------------------------|------------------|-----------------------|
| 1         | 1.98                   | 0.035            | 1.90                  |
| 2         | 2.25                   | 0.022            | 1.21                  |
| 3         | 2.88                   | 0.008            | 0.41                  |
| 4         | 3.15                   | 0.005            | 0.26                  |
| 5         | 3.23                   | 0.004            | 0.23                  |
| 6         | 4.93                   | 0.000            | 0.01                  |
| 7         | 4.80                   | 0.000            | 0.02                  |

|    |      |       |       |
|----|------|-------|-------|
| 8  | 0.00 | 1.000 | 53.84 |
| 9  | 1.21 | 0.129 | 6.93  |
| 10 | 2.48 | 0.015 | 0.82  |
| 11 | 1.05 | 0.169 | 9.08  |
| 12 | 1.93 | 0.039 | 2.08  |
| 13 | 3.15 | 0.005 | 0.26  |
| 14 | 1.63 | 0.064 | 3.45  |
| 15 | 1.22 | 0.126 | 6.80  |
| 16 | 3.82 | 0.002 | 0.08  |
| 17 | 3.10 | 0.005 | 0.29  |
| 18 | 3.31 | 0.004 | 0.20  |
| 19 | 2.69 | 0.011 | 0.57  |
| 20 | 3.91 | 0.001 | 0.07  |
| 21 | 2.14 | 0.027 | 1.45  |
| 22 | 1.03 | 0.175 | 9.41  |
| 23 | 3.27 | 0.004 | 0.21  |
| 24 | 3.69 | 0.002 | 0.11  |
| 25 | 3.04 | 0.006 | 0.32  |

Table S 4. The relative Gibbs free energy (in kcal mol<sup>-1</sup>) of each conformer with respect to the most stable structure, Boltzmann distribution of conformers and the Boltzmann mole fraction (in %) for each conformer of 4-hydroxyphenethyl-alcohol.

| Conf. No. | Relative energy (kcal mol <sup>-1</sup> ) | Boltzmann factor | Eq. mole fraction (%) |
|-----------|-------------------------------------------|------------------|-----------------------|
| 1         | 0.67                                      | 0.324            | 0.15                  |
| 2         | 1.56                                      | 0.072            | 0.03                  |
| 3         | 0.43                                      | 0.480            | 0.22                  |
| 4         | 0.63                                      | 0.345            | 0.16                  |
| 5         | 0.00                                      | 1.000            | 0.45                  |

Table S 5. The relative Gibbs free energy (in kcal mol<sup>-1</sup>) of each conformer with respect to the most stable structure, Boltzmann distribution of conformers and the Boltzmann mole fraction (in %) for each conformer of N-acetyl-D-glucosamine.

| Conf. No. | Relative energy (kcal mol <sup>-1</sup> ) | Boltzmann factor | Eq. mole fraction (%) |
|-----------|-------------------------------------------|------------------|-----------------------|
| 1         | 2.48                                      | 0.015            | 0.60                  |
| 2         | 2.22                                      | 0.023            | 0.92                  |
| 3         | 1.25                                      | 0.121            | 4.76                  |
| 4         | 0.14                                      | 0.789            | 31.03                 |
| 5         | 1.80                                      | 0.048            | 1.88                  |
| 6         | 2.38                                      | 0.018            | 0.70                  |
| 7         | 0.66                                      | 0.330            | 12.98                 |
| 8         | 1.72                                      | 0.054            | 2.14                  |

|    |      |       |       |
|----|------|-------|-------|
| 9  | 0.00 | 1.000 | 39.35 |
| 10 | 1.15 | 0.144 | 5.65  |

Table S 6. The relative Gibbs free energy (in kcal mol<sup>-1</sup>) of each conformer with respect to the most stable structure, Boltzmann distribution of conformers and the Boltzmann mole fraction (in %) for each conformer of N-acetylneuraminic-acid.

| Conf. No. | Relative energy (kcal mol <sup>-1</sup> ) | Boltzmann factor | Eq. mole fraction (%) |
|-----------|-------------------------------------------|------------------|-----------------------|
| 1         | 4.76                                      | 0.000            | 0.02                  |
| 2         | 5.56                                      | 0.000            | 0.01                  |
| 3         | 4.98                                      | 0.000            | 0.01                  |
| 4         | 2.50                                      | 0.015            | 0.98                  |
| 5         | 2.37                                      | 0.018            | 1.22                  |
| 6         | 4.00                                      | 0.001            | 0.08                  |
| 7         | 2.90                                      | 0.007            | 0.50                  |
| 8         | 3.62                                      | 0.002            | 0.15                  |
| 9         | 3.15                                      | 0.005            | 0.33                  |
| 10        | 4.03                                      | 0.001            | 0.07                  |
| 11        | 2.38                                      | 0.018            | 1.19                  |
| 12        | 4.62                                      | 0.000            | 0.03                  |
| 13        | 4.57                                      | 0.000            | 0.03                  |
| 14        | 5.17                                      | 0.000            | 0.01                  |
| 15        | 1.66                                      | 0.060            | 4.02                  |
| 16        | 3.96                                      | 0.001            | 0.08                  |
| 17        | 0.00                                      | 1.000            | 66.73                 |
| 18        | 0.60                                      | 0.362            | 24.14                 |
| 19        | 3.04                                      | 0.006            | 0.39                  |
| 20        | 6.90                                      | 0.000            | 0.00                  |

Table S 7. The relative Gibbs free energy (in kcal mol<sup>-1</sup>) of each conformer with respect to the most stable structure, Boltzmann distribution of conformers and the Boltzmann mole fraction (in %) for each conformer of Salicylate.

| Conf. No. | Relative energy (kcal mol <sup>-1</sup> ) | Boltzmann factor | Eq. mole fraction (%) |
|-----------|-------------------------------------------|------------------|-----------------------|
| 1         | 0.34                                      | 0.566            | 36.16                 |
| 2         | 0.00                                      | 1.000            | 63.84                 |

Table S 8. The relative Gibbs free energy (in kcal mol<sup>-1</sup>) of each conformer with respect to the most stable structure, Boltzmann distribution of conformers and the Boltzmann mole fraction (in %) for each conformer of Kanamycin.

| Conf. No. | Relative energy (kcal mol <sup>-1</sup> ) | Boltzmann factor | Eq. mole fraction (%) |
|-----------|-------------------------------------------|------------------|-----------------------|
| 1         | 1.98                                      | 0.035            | 1.90                  |
| 2         | 2.25                                      | 0.022            | 1.21                  |
| 3         | 2.88                                      | 0.008            | 0.41                  |
| 4         | 3.15                                      | 0.005            | 0.26                  |
| 5         | 3.23                                      | 0.004            | 0.23                  |



|    |      |       |       |
|----|------|-------|-------|
| 6  | 4.93 | 0.000 | 0.01  |
| 7  | 4.80 | 0.000 | 0.02  |
| 8  | 0.00 | 1.000 | 53.84 |
| 9  | 1.21 | 0.129 | 6.93  |
| 10 | 2.48 | 0.015 | 0.82  |
| 11 | 1.05 | 0.169 | 9.08  |
| 12 | 1.93 | 0.039 | 2.08  |
| 13 | 3.15 | 0.005 | 0.26  |
| 14 | 1.63 | 0.064 | 3.45  |
| 15 | 1.22 | 0.126 | 6.80  |
| 16 | 3.82 | 0.002 | 0.08  |
| 17 | 3.10 | 0.005 | 0.29  |
| 18 | 3.31 | 0.004 | 0.20  |
| 19 | 2.69 | 0.011 | 0.57  |
| 20 | 3.91 | 0.001 | 0.07  |

Table S 9. The relative Gibbs free energy (in kcal mol<sup>-1</sup>) of each conformer with respect to the most stable structure, Boltzmann distribution of conformers and the Boltzmann mole fraction (in %) for each conformer of Methyl-N-acetyl-alpha-D-glucosaminide.

| Conf. No. | Relative energy (kcal mol <sup>-1</sup> ) | Boltzmann factor | Eq. mole fraction (%) |
|-----------|-------------------------------------------|------------------|-----------------------|
| 1         | 6.84                                      | 0.000            | 0.00                  |
| 2         | 5.75                                      | 0.000            | 0.00                  |
| 3         | 0.00                                      | 1.000            | 0.54                  |
| 4         | 3.83                                      | 0.002            | 0.00                  |
| 5         | 0.21                                      | 0.697            | 0.38                  |
| 6         | 6.64                                      | 0.000            | 0.00                  |
| 7         | 6.63                                      | 0.000            | 0.00                  |
| 8         | 5.45                                      | 0.000            | 0.00                  |
| 9         | 1.09                                      | 0.157            | 0.08                  |
| 10        | 8.36                                      | 0.000            | 0.00                  |

Table S 10. The relative Gibbs free energy (in kcal mol<sup>-1</sup>) of each conformer with respect to the most stable structure, Boltzmann distribution of conformers and the Boltzmann mole fraction (in %) for each conformer of Pantothenate.

| Conf. No. | Relative energy (kcal mol <sup>-1</sup> ) | Boltzmann factor | Eq. mole fraction (%) |
|-----------|-------------------------------------------|------------------|-----------------------|
| 1         | 5.49                                      | 0.000            | 0.00                  |
| 2         | 0.30                                      | 0.598            | 0.21                  |
| 3         | 0.00                                      | 1.000            | 0.36                  |
| 4         | 3.43                                      | 0.003            | 0.00                  |
| 5         | 1.56                                      | 0.072            | 0.03                  |
| 6         | 4.48                                      | 0.001            | 0.00                  |
| 7         | 2.11                                      | 0.028            | 0.01                  |
| 8         | 4.26                                      | 0.001            | 0.00                  |
| 9         | 0.76                                      | 0.277            | 0.10                  |
| 10        | 5.08                                      | 0.000            | 0.00                  |
| 11        | 0.62                                      | 0.348            | 0.12                  |
| 12        | 2.21                                      | 0.024            | 0.01                  |

|    |       |       |      |
|----|-------|-------|------|
| 13 | 2.52  | 0.014 | 0.01 |
| 14 | 10.75 | 0.000 | 0.00 |
| 15 | 0.99  | 0.188 | 0.07 |
| 16 | 2.74  | 0.010 | 0.00 |
| 17 | 3.83  | 0.002 | 0.00 |
| 18 | 2.66  | 0.011 | 0.00 |
| 19 | 3.75  | 0.002 | 0.00 |
| 20 | 3.77  | 0.002 | 0.00 |
| 21 | 3.84  | 0.002 | 0.00 |
| 22 | 7.75  | 0.000 | 0.00 |
| 23 | 1.07  | 0.163 | 0.06 |
| 24 | 1.93  | 0.038 | 0.01 |
| 25 | 2.50  | 0.015 | 0.01 |

Table S 11. The relative Gibbs free energy (in kcal mol<sup>-1</sup>) of each conformer with respect to the most stable structure, Boltzmann distribution of conformers and the Boltzmann mole fraction (in %) for each conformer of Choline.

| Conf. No. | Relative energy (kcal mol <sup>-1</sup> ) | Boltzmann factor | Eq. mole fraction (%) |
|-----------|-------------------------------------------|------------------|-----------------------|
| 1         | 0.69                                      | 0.313            | 12.09                 |
| 2         | 0.00                                      | 1.000            | 38.56                 |
| 3         | 2.17                                      | 0.026            | 0.99                  |
| 4         | 2.61                                      | 0.012            | 0.47                  |
| 5         | 0.06                                      | 0.897            | 34.61                 |
| 6         | 0.65                                      | 0.333            | 12.85                 |
| 7         | 2.64                                      | 0.011            | 0.44                  |

Table S 12. Computed and experimental <sup>1</sup>H NMR chemical shift (in ppm) data of L-citrulline.

| Atom No. | Chemical Shift (ppm) | Exp. Chemical Shift (ppm) |
|----------|----------------------|---------------------------|
| H25      | 6.737                |                           |
| H19      | 3.669                | 3.743                     |
| H20      | 1.560                |                           |
| H21      | 1.891                |                           |
| H15      | 1.682                | 1.865                     |
| H16      | 2.124                | 1.865                     |
| H13      | 1.429                | 1.559                     |
| H14      | 1.595                | 1.559                     |
| H17      | 3.090                | 3.134                     |
| H18      | 2.889                | 3.134                     |
| H24      | 6.833                |                           |
| H22      | 3.766                |                           |
| H23      | 4.067                |                           |

Table S 13. Computed and experimental <sup>13</sup>C NMR chemical shift (in ppm) data of L-citrulline.

| Atom No. | Chemical Shift (ppm) | Exp. Chemical Shift (ppm) |
|----------|----------------------|---------------------------|
|----------|----------------------|---------------------------|

|    |         |         |
|----|---------|---------|
| C5 | 177.285 | 177.428 |
| C4 | 52.457  | 57.203  |
| C2 | 33.578  | 30.459  |
| C1 | 22.159  | 27.680  |
| C3 | 39.875  | 41.913  |
| C6 | 156.537 | 164.305 |

Table S 14. Computed and available experimental <sup>1</sup>H NMR shifts for O-succinyl-L- homoserine.

| Atom No. | Chemical Shift (ppm) | Exp. Chemical Shift (ppm) |
|----------|----------------------|---------------------------|
| H16      | 2.739                | 2.611                     |
| H17      | 2.710                | 2.469                     |
| H18      | 2.738                | 2.611                     |
| H19      | 2.664                | 2.469                     |
| H20      | 2.135                | 2.240                     |
| H21      | 1.827                | 2.240                     |
| H22      | 3.994                | 4.262                     |
| H23      | 4.219                | 4.262                     |
| H24      | 3.606                | 3.842                     |
| H25      | 1.373                | -                         |
| H26      | 1.237                | -                         |
| H27      | 6.638                | -                         |
| H28      | 6.942                | -                         |

Table S 15. Computed and available experimental <sup>13</sup>C NMR chemical shifts for O-succinyl-L- homoserine.

| Atom No. | Chemical Shift (ppm) | Exp. Chemical Shift (ppm) |
|----------|----------------------|---------------------------|
| C1       | 30.039               | 33.200                    |
| C2       | 31.209               | 34.644                    |
| C3       | 33.214               | 32.044                    |
| C4       | 63.174               | 64.459                    |
| C5       | 52.461               | 55.519                    |
| C6       | 173.748              | -                         |
| C7       | 172.761              | -                         |
| C8       | 177.029              | -                         |

Table S 16. Computed and experimental <sup>1</sup>H NMR chemical shift (in ppm) data of 4-hydroxyphenethyl-alcohol.

| Atom No. | Chemical Shift (ppm) | Exp. Chemical Shift (ppm) |
|----------|----------------------|---------------------------|
| H11      | 7.078                | 7.177                     |
| H12      | 7.174                | 7.177                     |
| H13      | 6.704                | 6.859                     |
| H14      | 6.750                | 6.859                     |
| H15      | 2.707                | 2.775                     |
| H16      | 2.743                | 2.775                     |
| H17      | 3.784                | 3.778                     |
| H18      | 3.788                | 3.778                     |
| H19      | 1.200                |                           |
| H20      | 4.855                |                           |

Table S 17. Computed and experimental  $^{13}\text{C}$  NMR chemical shift (in ppm) data of 4-hydroxyphenethyl-alcohol.

| Atom No. | Chemical Shift (ppm) | Exp. Chemical Shift (ppm) |
|----------|----------------------|---------------------------|
| C1       | 128.571              | 133.011                   |
| C2       | 127.024              | 133.011                   |
| C3       | 110.595              | 118.097                   |
| C4       | 111.288              | 118.097                   |
| C5       | 38.025               | 39.605                    |
| C6       | 64.475               | 65.463                    |
| C7       | 130.974              | 133.653                   |
| C8       | 152.984              | 156.523                   |

Table S 18. Computed and experimental  $^1\text{H}$  NMR chemical shift (in ppm) data of N-acetyl-D-glucosamine.

| Atom No. | Chemical Shift (ppm) | Exp. Chemical Shift (ppm) |
|----------|----------------------|---------------------------|
| H16      | 1.858                | 2.043                     |
| H17      | 2.016                | 2.043                     |
| H18      | 1.972                | 2.043                     |
| H19      | 3.857                | 3.829                     |
| H20      | 3.836                | 3.816                     |
| H21      | 3.434                | 3.845                     |
| H22      | 3.593                | 3.869                     |
| H23      | 3.612                | 3.481                     |
| H24      | 3.559                | 3.760                     |
| H25      | 4.905                | 5.191                     |
| H26      | 5.918                |                           |
| H27      | 1.773                |                           |
| H28      | 2.870                |                           |
| H29      | 3.456                |                           |
| H30      | 3.062                |                           |

Table S 19. Computed and experimental  $^{13}\text{C}$  NMR chemical shift (in ppm) data of N-acetyl-D-glucosamine.

| Atom No. | Chemical Shift (ppm) | Exp. Chemical Shift (ppm) |
|----------|----------------------|---------------------------|
| C1       | 21.090               | 24.888                    |
| C2       | 62.791               | 63.426                    |
| C3       | 171.429              | 177.490                   |
| C4       | 73.106               | 78.660                    |

|    |        |        |
|----|--------|--------|
| C5 | 56.011 | 59.382 |
| C6 | 72.489 | 72.750 |
| C7 | 76.390 | 76.593 |
| C8 | 93.785 | 97.635 |

Table S 20. Computed and experimental  $^1\text{H}$  NMR chemical shift (in ppm) data of N-acetylneuraminic-acid.

| Atom No. | Chemical Shift (ppm) | Exp. Chemical Shift (ppm) |
|----------|----------------------|---------------------------|
| H22      | 1.993                | 2.045                     |
| H23      | 2.393                | 2.045                     |
| H24      | 1.755                | 2.045                     |
| H25      | 2.218                | 2.009                     |
| H26      | 2.079                | 2.009                     |
| H27      | 3.575                | 3.718                     |
| H28      | 3.989                | 3.718                     |
| H29      | 3.783                | 4.019                     |
| H30      | 3.716                | 3.752                     |
| H31      | 3.699                | 3.903                     |
| H32      | 3.705                | 3.503                     |
| H33      | 3.864                | 3.978                     |
| H34      | 5.590                |                           |
| H35      | 1.496                |                           |
| H36      | 1.345                |                           |
| H37      | 2.583                |                           |
| H38      | 2.966                |                           |
| H39      | 6.931                |                           |
| H40      | 3.185                |                           |

Table S 21. Computed and experimental  $^{13}\text{C}$  NMR chemical shift (in ppm) data of N-acetylneuraminic-acid.

| Atom No. | Chemical Shift (ppm) | Exp. Chemical Shift (ppm) |
|----------|----------------------|---------------------------|
| C1       | 22.046               | 24.819                    |
| C2       | 38.029               | 42.090                    |
| C3       | 64.183               | 66.006                    |
| C4       | 170.672              |                           |
| C5       | 69.101               | 70.005                    |
| C6       | 70.019               | 73.015                    |
| C7       | 51.839               | 54.968                    |
| C8       | 73.494               | 71.251                    |
| C9       | 73.164               | 72.909                    |
| C10      | 167.818              |                           |
| C11      | 93.926               | 99.105                    |

Table S 22. Computed and experimental  $^1\text{H}$  NMR chemical shift (in ppm) data of Salicylate.

| Atom No. | Chemical Shift (ppm) | Exp. Chemical Shift (ppm) |
|----------|----------------------|---------------------------|
| H11      | 6.939                | 6.952                     |

|     |       |       |
|-----|-------|-------|
| H12 | 7.521 | 7.451 |
| H13 | 7.667 | 7.818 |
| H14 | 6.958 | 6.952 |
| H15 | 8.907 |       |
| H16 | 8.870 |       |

Table S 23. Computed and experimental  $^{13}\text{C}$  NMR chemical shift (in ppm) data of Salicylate.

| Atom No. | Chemical Shift (ppm) | Exp. Chemical Shift (ppm) |
|----------|----------------------|---------------------------|
| C1       | 117.174              | 122.098                   |
| C2       | 134.950              | 136.705                   |
| C3       | 127.875              | 133.200                   |
| C4       | 115.008              | 119.007                   |
| C5       | 109.821              | 120.713                   |
| C6       | 158.376              | 162.310                   |
| C7       | 166.471              |                           |

Table S 24. Computed and experimental  $^1\text{H}$  NMR chemical shift (in ppm) data of Kanamycin.

| Atom No. | Chemical Shift (ppm) | Exp. Chemical Shift (ppm) |
|----------|----------------------|---------------------------|
| H34      | 2.194                | 2.393                     |
| H35      | 1.909                | 1.798                     |
| H36      | 3.619                | 3.457                     |
| H37      | 3.113                | 3.155                     |
| H38      | 3.202                | 3.810                     |
| H39      | 3.191                | 3.810                     |
| H40      | 3.601                | 3.765                     |
| H41      | 3.117                | 3.431                     |
| H42      | 3.709                | 4.012                     |
| H43      | 4.101                | 3.929                     |
| H44      | 3.755                | 3.686                     |
| H45      | 3.618                | 3.460                     |
| H46      | 3.064                | 3.365                     |
| H47      | 3.718                | 3.954                     |
| H48      | 3.730                | 3.780                     |
| H49      | 3.503                | 3.660                     |
| H50      | 3.933                | 3.895                     |
| H51      | 3.321                | 3.702                     |
| H52      | 3.903                | 3.787                     |
| H53      | 4.611                | 5.146                     |
| H54      | 5.134                | 5.609                     |
| H55      | 4.091                |                           |
| H56      | 2.409                |                           |
| H57      | 0.091                |                           |
| H58      | 5.403                |                           |
| H59      | 5.111                |                           |
| H60      | 2.302                |                           |
| H61      | 0.493                |                           |
| H62      | 0.234                |                           |
| H63      | 3.678                |                           |
| H64      | 3.098                |                           |

|     |       |  |
|-----|-------|--|
| H65 | 3.710 |  |
| H66 | 2.703 |  |
| H67 | 0.455 |  |
| H68 | 2.495 |  |
| H69 | 1.674 |  |

Table S 25. Computed and experimental  $^{13}\text{C}$  NMR chemical shift (in ppm) data of Kanamycin.

| Atom No. | Chemical Shift (ppm) | Exp. Chemical Shift (ppm) |
|----------|----------------------|---------------------------|
| C1       | 33.549               | 32.427                    |
| C2       | 44.819               | 43.202                    |
| C3       | 61.502               | 62.596                    |
| C4       | 49.101               | 50.886                    |
| C5       | 50.713               | 52.838                    |
| C6       | 69.908               | 71.349                    |
| C7       | 69.519               | 71.237                    |
| C8       | 70.904               | 68.491                    |
| C9       | 56.810               | 57.712                    |
| C10      | 71.501               | 73.843                    |
| C11      | 74.920               | 75.297                    |
| C12      | 72.185               | 74.826                    |
| C13      | 75.073               | 73.736                    |
| C14      | 75.709               | 76.150                    |
| C15      | 85.198               | 87.470                    |
| C16      | 82.093               | 82.376                    |
| C17      | 101.901              | 103.106                   |
| C18      | 97.163               | 99.391                    |

Table S 26. Computed and experimental  $^1\text{H}$  NMR chemical shift (in ppm) data of Methyl-N-acetyl-alpha-D-glucosaminide.

| Atom No. | Chemical Shift (ppm) | Exp. Chemical Shift (ppm) |
|----------|----------------------|---------------------------|
| H17      | 2.444                | 2.028                     |
| H18      | 1.583                | 2.028                     |
| H19      | 2.499                | 2.028                     |
| H20      | 3.429                | 3.376                     |
| H21      | 3.059                | 3.376                     |
| H22      | 3.662                | 3.376                     |
| H23      | 4.434                | 3.732                     |
| H24      | 3.618                | 3.732                     |
| H25      | 3.833                | 3.469                     |
| H26      | 3.461                | 4.751                     |
| H27      | 3.615                | 3.732                     |
| H28      | 4.180                | 3.897                     |
| H29      | 4.702                | 3.897                     |
| H30      | 5.993                |                           |
| H31      | 1.233                |                           |
| H32      | 1.978                |                           |
| H33      | 2.299                |                           |

Table S 27. Computed and experimental  $^{13}\text{C}$  NMR chemical shift (in ppm) data of Methyl-N-acetyl-alpha-D-glucosaminide.

| Atom No. | Chemical Shift (ppm) | Exp. Chemical Shift (ppm) |
|----------|----------------------|---------------------------|
| C1       | 21.213               | 24.595                    |
| C2       | 52.026               | 57.842                    |
| C3       | 62.241               | 63.243                    |
| C4       | 172.736              | 177.781                   |
| C5       | 75.657               | 72.662                    |
| C6       | 55.186               | 56.329                    |
| C7       | 70.087               | 73.817                    |
| C8       | 70.944               | 74.368                    |
| C9       | 95.534               | 100.785                   |

Table S 28. Computed and experimental  $^1\text{H}$  NMR chemical shift (in ppm) data of Pantothenate.

| Atom No. | Chemical Shift (ppm) | Exp. Chemical Shift (ppm) |
|----------|----------------------|---------------------------|
| H16      | 1.037                | 0.919                     |
| H17      | 0.648                | 0.919                     |
| H18      | 1.044                | 0.919                     |
| H19      | 0.992                | 0.919                     |
| H20      | 0.653                | 0.919                     |
| H21      | 1.263                | 0.919                     |
| H22      | 2.911                | 3.429                     |
| H23      | 2.472                | 3.429                     |
| H24      | 3.701                | 3.429                     |
| H25      | 3.163                | 3.429                     |
| H26      | 3.599                | 3.429                     |
| H27      | 3.613                | 3.429                     |
| H28      | 4.052                | 3.971                     |
| H29      | 6.674                |                           |
| H30      | 2.197                |                           |
| H31      | 7.398                |                           |
| H32      | 3.738                |                           |

Table S 29. Computed and experimental  $^{13}\text{C}$  NMR chemical shift (in ppm) data of Pantothenate.

| Atom No. | Chemical Shift (ppm) | Exp. Chemical Shift (ppm) |
|----------|----------------------|---------------------------|
| C1       | 19.214               | 23.234                    |
| C2       | 18.506               | 23.234                    |
| C3       | 34.832               | 39.377                    |
| C4       | 36.262               | 39.377                    |
| C5       | 70.946               | 71.100                    |
| C6       | 172.776              | 177.649                   |
| C7       | 76.584               | 78.459                    |
| C8       | 172.038              | 183.020                   |
| C9       | 39.650               | 41.277                    |



Table S 30. Computed and experimental <sup>1</sup>H NMR chemical shift (in ppm) data of Choline.

| Atom No. | Chemical Shift (ppm) | Exp. Chemical Shift (ppm) |
|----------|----------------------|---------------------------|
| H8       | 2.890                | 3.195                     |
| H9       | 2.986                | 3.195                     |
| H10      | 2.845                | 3.195                     |
| H11      | 2.827                | 3.195                     |
| H12      | 3.311                | 3.195                     |
| H13      | 3.165                | 3.195                     |
| H14      | 2.815                | 3.195                     |
| H15      | 2.838                | 3.195                     |
| H16      | 3.395                | 3.195                     |
| H17      | 3.320                | 3.514                     |
| H18      | 3.101                | 3.514                     |
| H19      | 3.947                | 4.053                     |
| H20      | 4.157                | 4.053                     |
| H21      | 1.640                |                           |

Table S 31. Computed and experimental <sup>13</sup>C NMR chemical shift (in ppm) data of Choline.

| Atom No. | Chemical Shift (ppm) | Exp. Chemical Shift (ppm) |
|----------|----------------------|---------------------------|
| C1       | 51.376               | 56.615                    |
| C2       | 50.365               | 56.615                    |
| C3       | 53.361               | 56.615                    |
| C4       | 64.986               | 70.141                    |
| C5       | 57.822               | 58.325                    |

Table S 32. No. of atoms, No. of rotatable bonds, Force-field generated conformation, ANI optimized conformations, and No. of Cluster are reported.

| No | Metabolites (ionic form) | No. of atoms | No. of rotatable bonds | Conf. Nos. (FF) | ANI Optimized Conf. Nos. | Number of clusters |
|----|--------------------------|--------------|------------------------|-----------------|--------------------------|--------------------|
| 1  | L- citrulline            | 25           | 6                      | 107             | 107                      | 12                 |
| 2  | O-succinyl-L-homoserine  | 27           | 8                      | 42              | 42                       | 5                  |
| 3  | N-acetylneuraminic-acid  | 39           | 10                     | 85              | 85                       | 9                  |
| 4  | Salicylate               | 15           | 1                      | 1               | 1                        | -                  |

Table S 33. Relative energies, Boltzmann factor and Equilibrium mole fraction of all structurally distinct conformations of O-succinyl-L- homoserine (zwitterionic state)

| Conf No. | Relative energy (kcal) | Boltzmann factor | Eq. mole fraction (%) |
|----------|------------------------|------------------|-----------------------|
| 1        | 1.59                   | 0.07             | 4.73                  |
| 2        | 0.00                   | 1.00             | 69.63                 |
| 3        | 2.40                   | 0.02             | 1.22                  |

|   |      |      |       |
|---|------|------|-------|
| 4 | 3.88 | 0.00 | 0.10  |
| 5 | 0.62 | 0.35 | 24.32 |

Table S 34. The relative Gibbs free energy (in kcal mol<sup>-1</sup>) of each conformer with respect to the most stable structure, Boltzmann distribution of conformers and the Boltzmann mole fraction (in %) for each conformer of L- citrulline (zwitterionic form).

| Conf. No. | Relative energy (kcal mol <sup>-1</sup> ) | Boltzmann factor | Eq. mole fraction (%) |
|-----------|-------------------------------------------|------------------|-----------------------|
| 1         | 3.87                                      | 0.001            | 0.00                  |
| 2         | 2.51                                      | 0.014            | 0.01                  |
| 3         | 1.55                                      | 0.073            | 0.04                  |
| 4         | 2.84                                      | 0.008            | 0.00                  |
| 5         | 2.62                                      | 0.012            | 0.01                  |
| 6         | 0.00                                      | 1.000            | 0.59                  |
| 7         | 0.72                                      | 0.299            | 0.18                  |
| 8         | 2.48                                      | 0.015            | 0.01                  |
| 9         | 3.52                                      | 0.003            | 0.00                  |
| 10        | 2.98                                      | 0.007            | 0.00                  |
| 11        | 0.98                                      | 0.190            | 0.11                  |
| 12        | 1.54                                      | 0.074            | 0.04                  |

Table S 35. The relative Gibbs free energy (in kcal mol<sup>-1</sup>) of each conformer with respect to the most stable structure, Boltzmann distribution of conformers and the Boltzmann mole fraction (in %) for each conformer of N-acetylneuraminic-acid (anionic form).

| Conf. No. | Relative energy (kcal mol <sup>-1</sup> ) | Boltzmann factor | Eq. mole fraction (%) |
|-----------|-------------------------------------------|------------------|-----------------------|
| 1         | 1.91                                      | 0.040            | 0.03                  |
| 2         | 1.35                                      | 0.101            | 0.07                  |

|   |      |       |      |
|---|------|-------|------|
| 3 | 1.77 | 0.051 | 0.03 |
| 4 | 1.80 | 0.048 | 0.03 |
| 5 | 1.43 | 0.090 | 0.06 |
| 6 | 4.45 | 0.001 | 0.00 |
| 7 | 1.30 | 0.111 | 0.08 |
| 8 | 2.94 | 0.007 | 0.00 |
| 9 | 0.00 | 1.000 | 0.69 |

Table S 36. Computed and available experimental  $^{13}\text{C}$  NMR chemical shifts for O-succinyl-L- homoserine (zwitterionic state)

| Atom | Computed | Experimental |
|------|----------|--------------|
| H16  | 2.277    | 2.611        |
| H17  | 2.327    | 2.469        |
| H18  | 2.543    | 2.611        |
| H19  | 2.498    | 2.469        |
| H20  | 2.179    | 2.240        |
| H21  | 2.400    | 2.240        |
| H22  | 3.857    | 4.262        |
| H23  | 4.017    | 4.262        |
| H24  | 3.624    | 3.842        |
| H25  | 6.548    |              |
| H26  | 10.562   |              |
| H27  | 4.840    |              |

Table S 37. Computed and available experimental  $^{13}\text{C}$  NMR chemical shifts for O-succinyl-L-homoserine (zwitterionic state)

| Atom | Computed | Experimental |
|------|----------|--------------|
| C1   | 38.203   | 33.200       |
| C2   | 34.991   | 34.644       |
| C3   | 29.396   | 32.044       |
| C4   | 62.805   | 64.459       |
| C5   | 55.851   | 55.519       |
| C6   | 179.992  |              |
| C7   | 175.638  |              |
| C8   | 169.767  |              |

Table S 38. Computed and experimental  $^1\text{H}$  NMR chemical shift (in ppm) data of L-citrulline (zwitterionic form)

| Atom No. | Chemical Shift (ppm) | Exp. Chemical Shift (ppm) |
|----------|----------------------|---------------------------|
| H13      | 1.608                | 1.559                     |
| H14      | 1.609                | 1.559                     |
| H15      | 1.858                | 1.865                     |
| H16      | 2.009                | 1.865                     |
| H17      | 2.908                | 3.134                     |
| H18      | 3.221                | 3.134                     |
| H19      | 3.690                | 3.743                     |
| H20      | 5.133                |                           |
| H21      | 4.385                |                           |
| H22      | 4.058                |                           |
| H23      | 3.930                |                           |
| H24      | 4.588                |                           |

|     |       |  |
|-----|-------|--|
| H25 | 4.451 |  |
|-----|-------|--|

Table S 39. Computed and experimental  $^{13}\text{C}$  NMR chemical shift (in ppm) data of L-citrulline (zwitterionic form).

| Atom No. | Chemical Shift (ppm) | Exp. Chemical Shift (ppm) |
|----------|----------------------|---------------------------|
| C1       | 24.906               | 27.680                    |
| C2       | 30.806               | 30.459                    |
| C3       | 39.939               | 41.913                    |
| C4       | 55.190               | 57.203                    |
| C5       | 170.442              | 177.428                   |
| C6       | 156.656              | 164.305                   |

Table S 40. Computed and experimental  $^1\text{H}$  NMR chemical shift (in ppm) data of N-acetylneuraminic-acid (anionic form).

| Atom No. | Chemical Shift (ppm) | Exp. Chemical Shift (ppm) |
|----------|----------------------|---------------------------|
| H22      | 2.003                | 2.045                     |
| H23      | 1.826                | 2.045                     |
| H24      | 1.949                | 2.045                     |
| H25      | 1.915                | 2.009                     |
| H26      | 2.062                | 2.009                     |
| H27      | 3.410                | 3.718                     |
| H28      | 4.026                | 3.718                     |
| H29      | 3.685                | 4.019                     |
| H30      | 3.835                | 3.752                     |
| H31      | 3.914                | 3.903                     |
| H32      | 3.608                | 3.503                     |
| H33      | 4.336                | 3.978                     |
| H34      | 6.087                |                           |
| H35      | 1.483                |                           |
| H36      | 8.076                |                           |
| H37      | 3.043                |                           |

|     |       |  |
|-----|-------|--|
| H38 | 2.569 |  |
| H39 | 4.691 |  |

Table S 41. Computed and experimental  $^{13}\text{C}$  NMR chemical shift (in ppm) data of N-acetylneuraminic-acid (anionic form).

| Atom No. | Chemical Shift (ppm) | Exp. Chemical Shift (ppm) |
|----------|----------------------|---------------------------|
| C1       | 21.666               | 24.819                    |
| C2       | 33.615               | 42.090                    |
| C3       | 63.605               | 66.006                    |
| C4       | 168.957              |                           |
| C5       | 66.948               | 70.005                    |
| C6       | 72.429               | 73.015                    |
| C7       | 48.622               | 54.968                    |
| C8       | 71.862               | 71.251                    |
| C9       | 69.980               | 72.909                    |
| C10      | 171.771              |                           |
| C11      | 93.939               | 99.105                    |

Table S 42. Computed and experimental  $^1\text{H}$  NMR chemical shift (in ppm) data of Salicylate (anionic form).

| Atom No. | Chemical Shift (ppm) | Exp. Chemical Shift (ppm) |
|----------|----------------------|---------------------------|
| H11      | 6.701                | 6.952                     |
| H12      | 7.240                | 7.451                     |
| H13      | 7.787                | 7.818                     |
| H14      | 6.761                | 6.952                     |
| H15      | 14.851               |                           |

Table S 43. Computed and experimental  $^{13}\text{C}$  NMR chemical shift (in ppm) data of Salicylate (anionic form).

| Atom No. | Chemical Shift (ppm) | Exp. Chemical Shift (ppm) |
|----------|----------------------|---------------------------|
| C1       | 113.868              | 122.098                   |
| C2       | 130.172              | 136.705                   |
| C3       | 127.698              | 133.200                   |
| C4       | 113.043              | 119.007                   |
| C5       | 116.841              | 120.713                   |
| C6       | 160.696              | 162.310                   |
| C7       | 171.400              | 178.336                   |

Table S 44. MAE values of the  $^1\text{H}$  and  $^{13}\text{C}$  NMR chemical shifts. Values are in ppm unit.

| No. | Metabolite<br>(Ionic state in the<br>solvent, $\text{D}_2\text{O}$ ) | MAE          |                 |
|-----|----------------------------------------------------------------------|--------------|-----------------|
|     |                                                                      | $^1\text{H}$ | $^{13}\text{C}$ |
| 1   | O-succinyl-L-homoserine                                              | 0.185        | 1.997           |
| 2   | L- citrulline                                                        | 0.088        | 3.624           |
| 3   | N-acetylneuraminic-acid                                              | 0.167        | 3.636           |
| 4   | Salicylate                                                           | 0.171        | 4.379           |

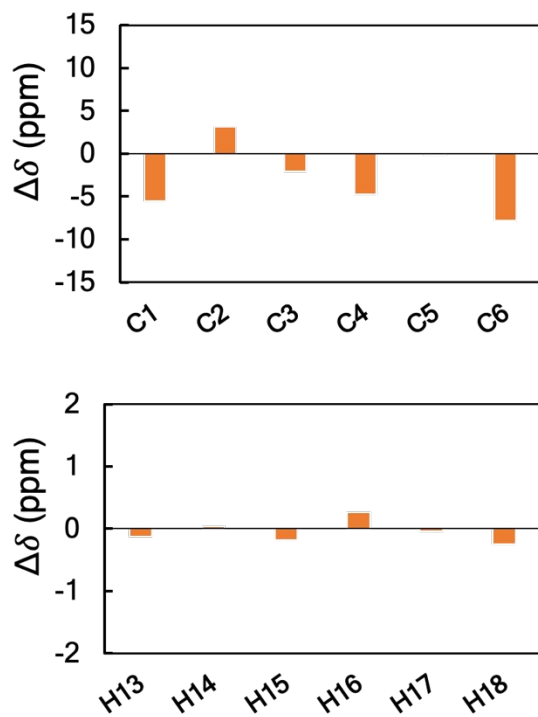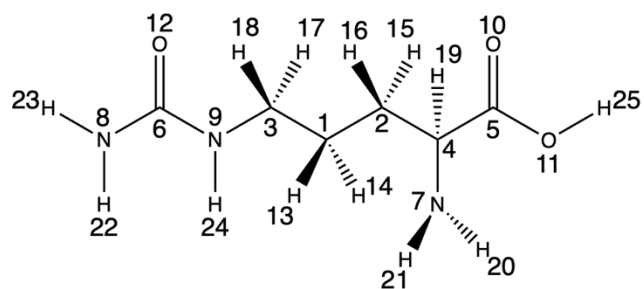

Figure S1. Plots of the differences between the calculated and experimental  $^1\text{H}$  and  $^{13}\text{C}$  NMR chemical shifts of L- citrulline. Shielding constants were computed at the B3LYP/6311G+(2d, p) level of theory and converted to linear scaled reference chemical shifts. Values of chemical shift differences are given in ppm.



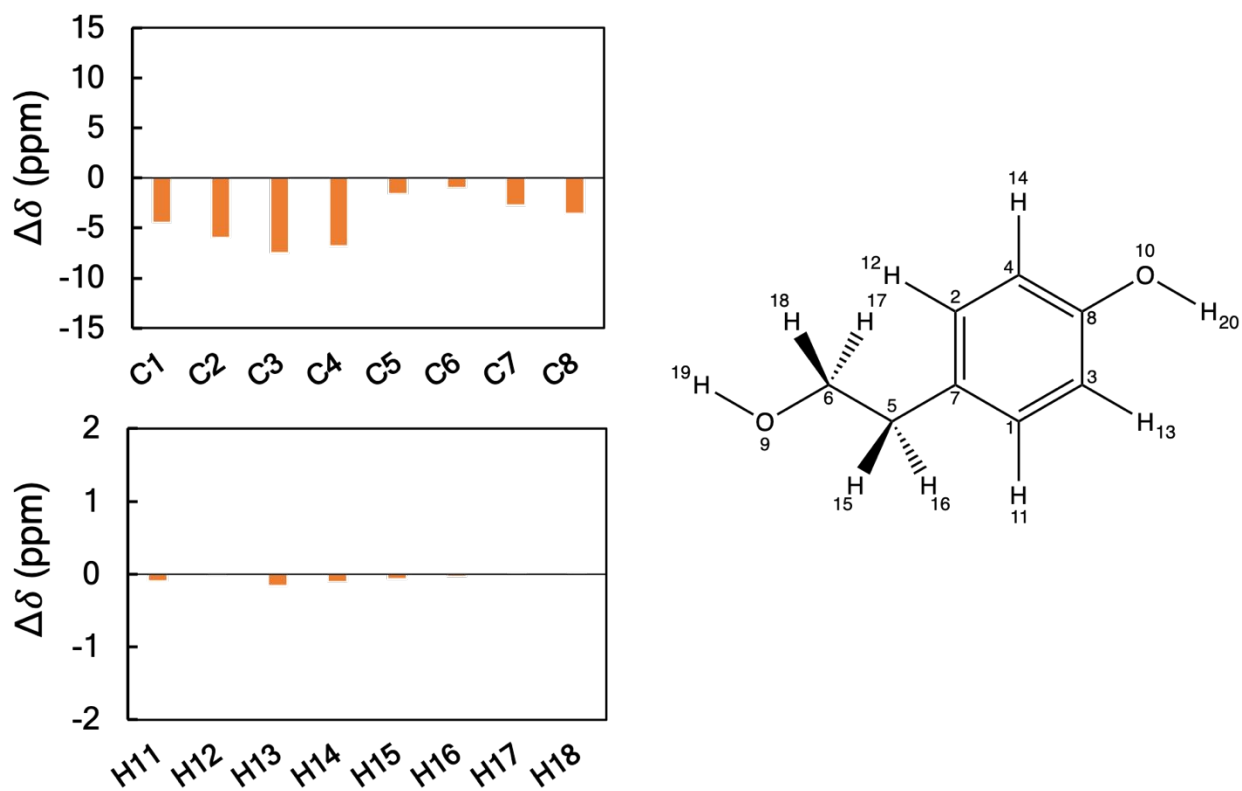

Figure S2. Plots of the differences between the calculated and experimental  $^1\text{H}$  and  $^{13}\text{C}$  NMR chemical shifts of 4-hydroxyphenethyl-alcohol. Shielding constants were computed at the B3LYP/6311G+(2d, p) level of theory and converted to linear scaled reference chemical shifts. Values of chemical shift differences are given in ppm.

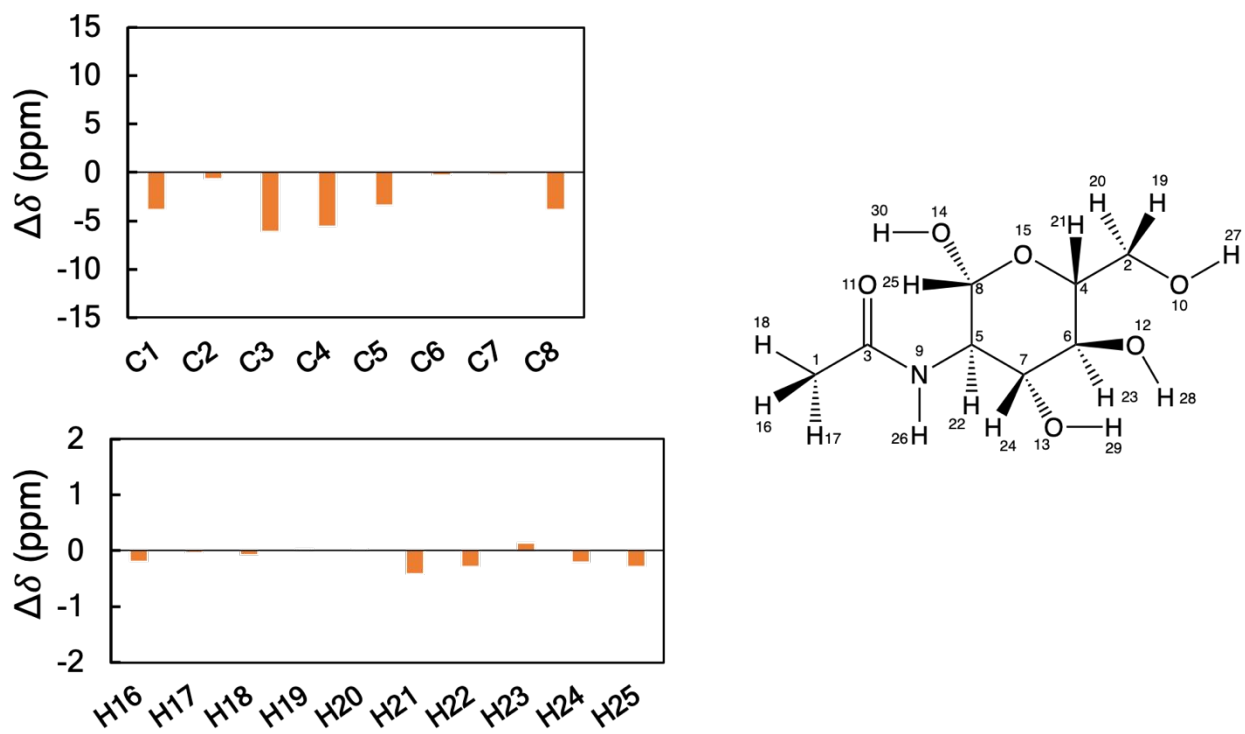

Figure S3. Plots of the differences between the calculated and experimental <sup>1</sup>H and <sup>13</sup>C NMR chemical shifts of N-acetyl-D-glucosamine. Shielding constants were computed at the B3LYP/6311G+(2d, p) level of theory and converted to linear scaled reference chemical shifts. Values of chemical shift differences are given in ppm.

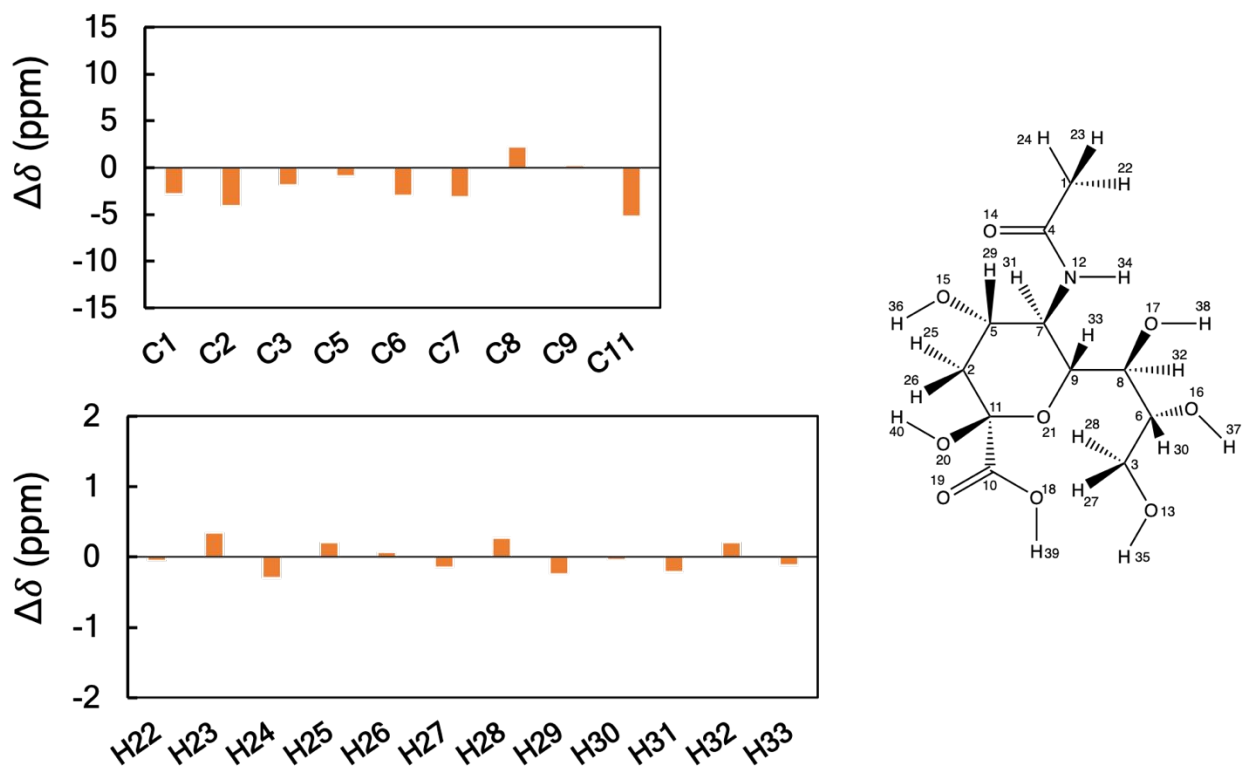

Figure S4. Plots of the differences between the calculated and experimental  $^1\text{H}$  and  $^{13}\text{C}$  NMR chemical shifts of N-acetylneuraminic-acid. Shielding constants were computed at the B3LYP/6311G+(2d, p) level of theory and converted to linear scaled reference chemical shifts. Values of chemical shift differences are given in ppm.

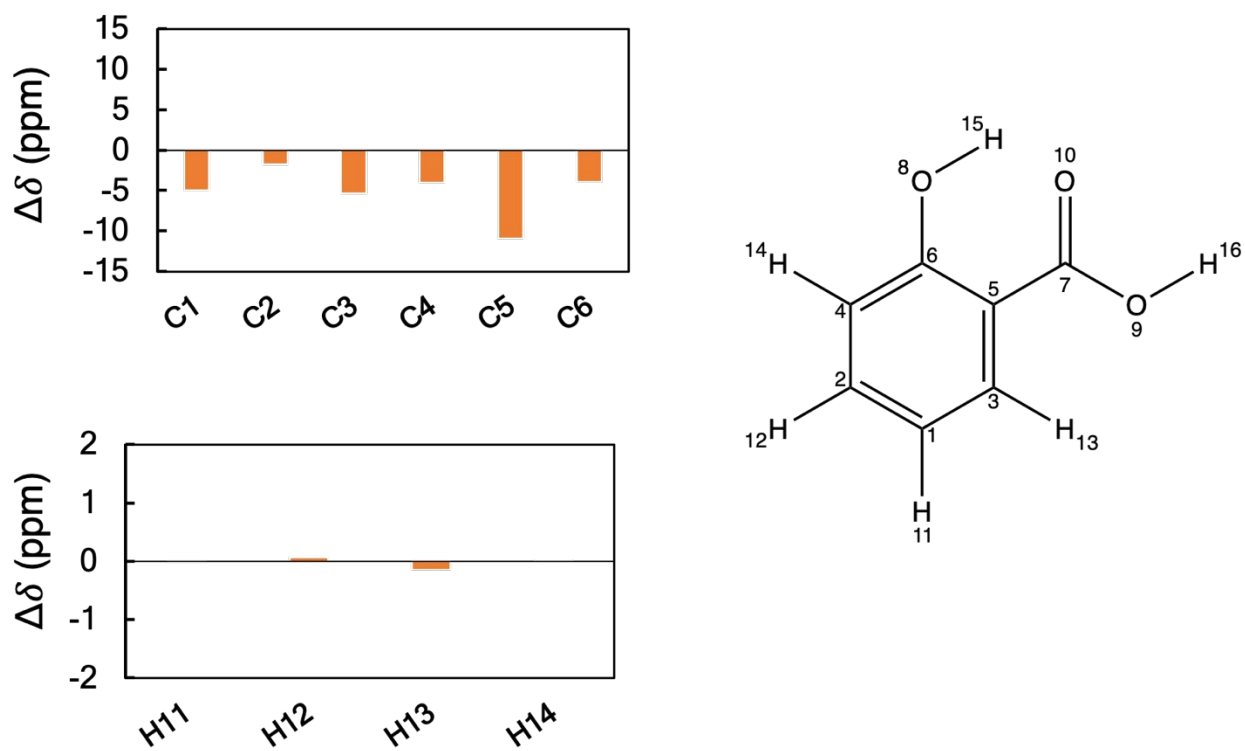

Figure S5. Plots of the differences between the calculated and experimental  $^1\text{H}$  and  $^{13}\text{C}$  NMR chemical shifts of Salicylate. Shielding constants were computed at the B3LYP/6311G+(2d, p) level of theory and converted to linear scaled reference chemical shifts. Values of chemical shift differences are given in ppm.

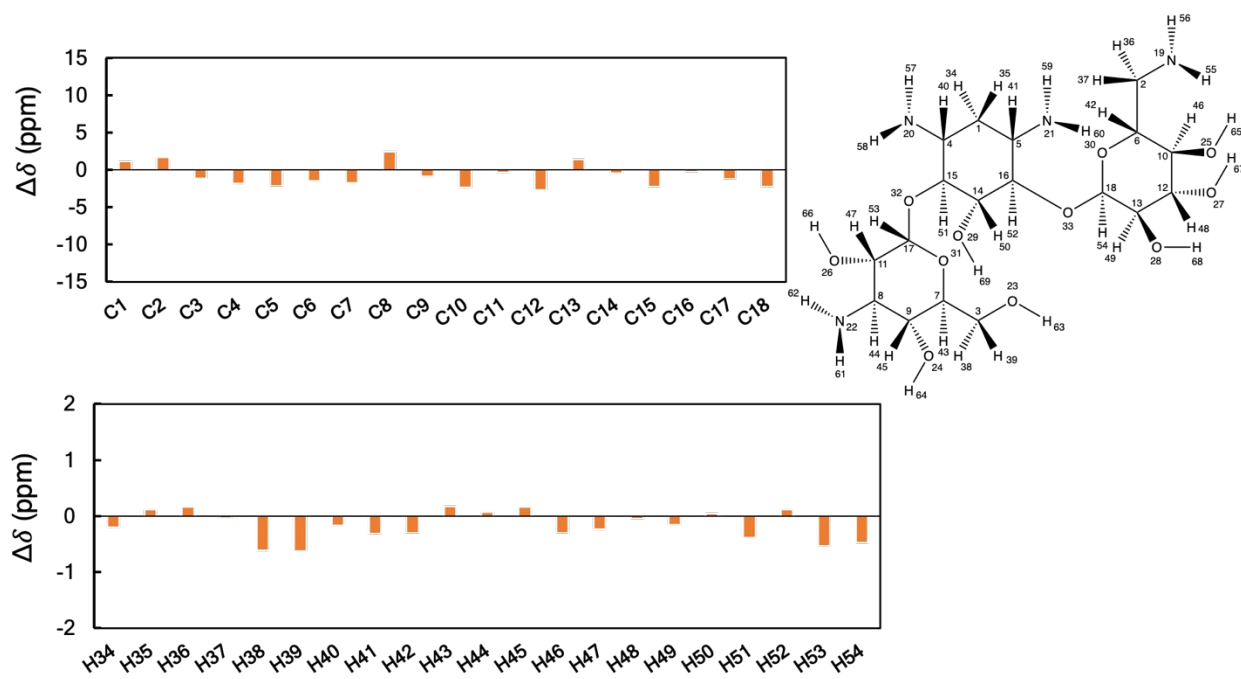

Figure S6. Plots of the differences between the calculated and experimental  $^1\text{H}$  and  $^{13}\text{C}$  NMR chemical shifts of Kanamycin. Shielding constants were computed at the B3LYP/6311G+(2d, p) level of theory and converted to linear scaled reference chemical shifts. Values of chemical shift differences are given in ppm.

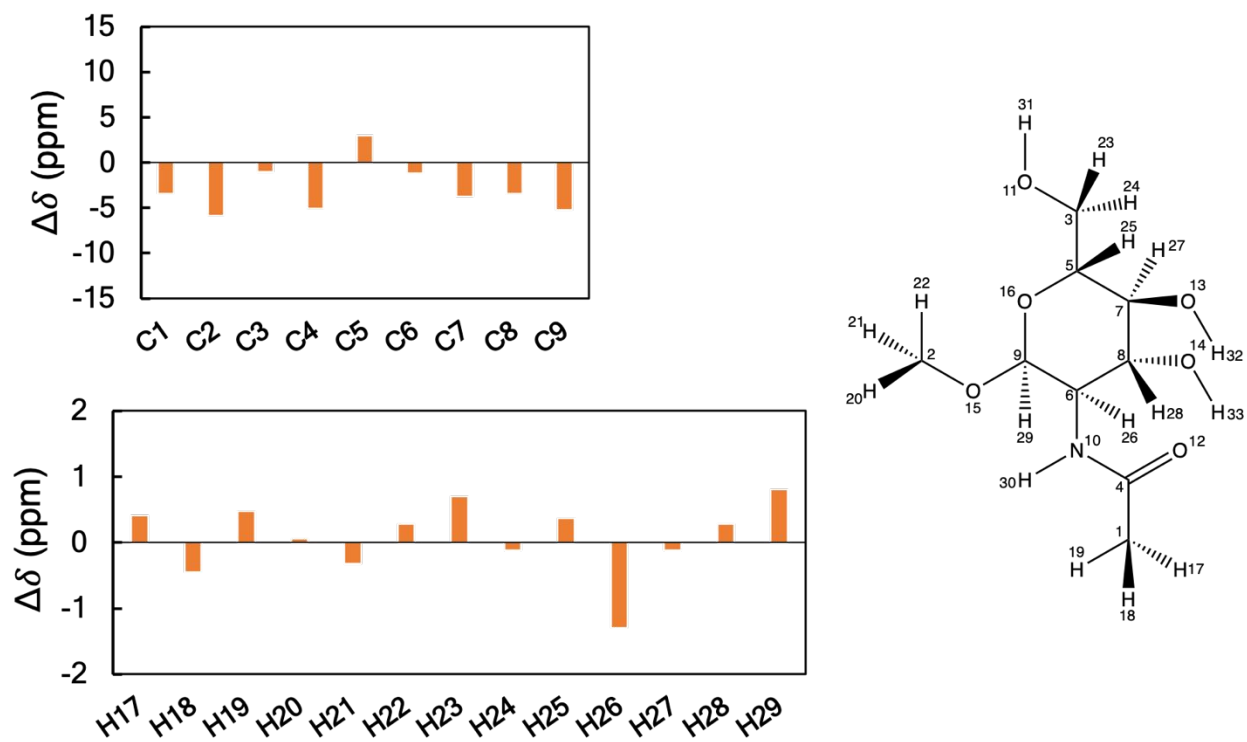

Figure S7. Plots of the differences between the calculated and experimental  $^1\text{H}$  and  $^{13}\text{C}$  NMR chemical shifts of Methyl-N-acetyl-alpha-D-glucosaminide. Shielding constants were computed at the B3LYP/6311G+(2d, p) level of theory and converted to linear scaled reference chemical shifts. Values of chemical shift differences are given in ppm.

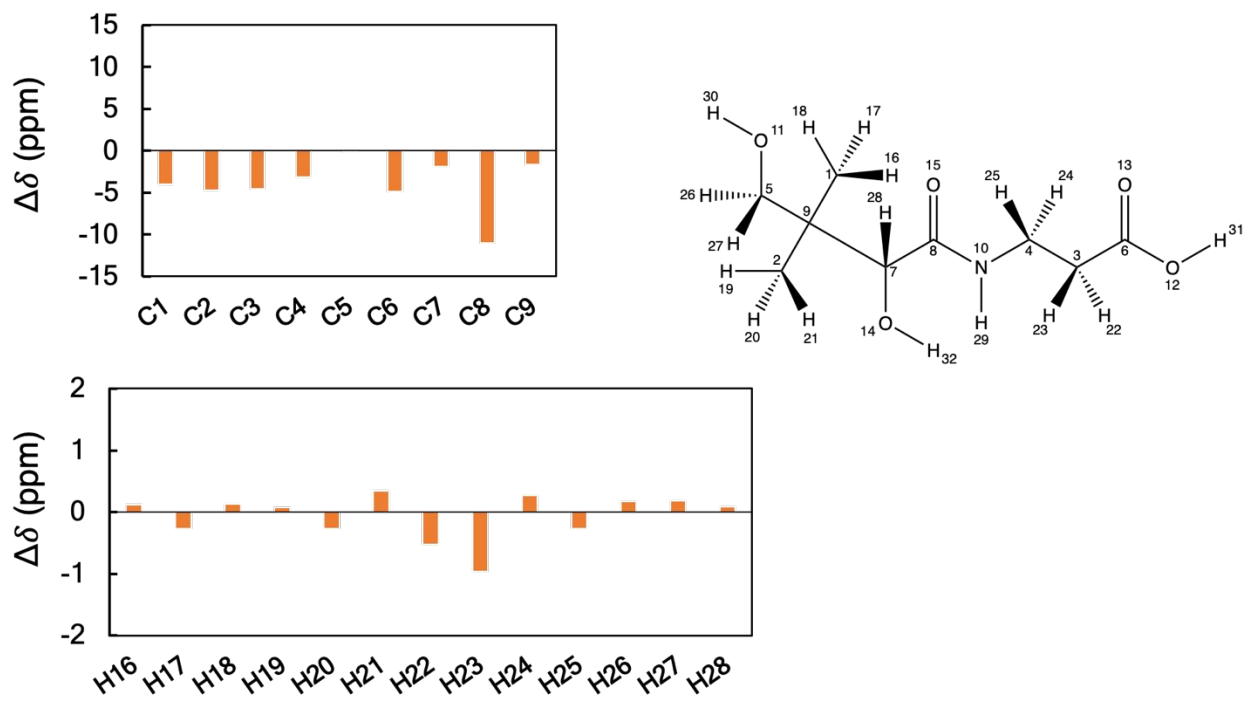

Figure S8. Plots of the differences between the calculated and experimental  $^1\text{H}$  and  $^{13}\text{C}$  NMR chemical shifts of Pantothenate. Shielding constants were computed at the B3LYP/6311G+(2d, p) level of theory and converted to linear scaled reference chemical shifts. Values of chemical shift differences are given in ppm.

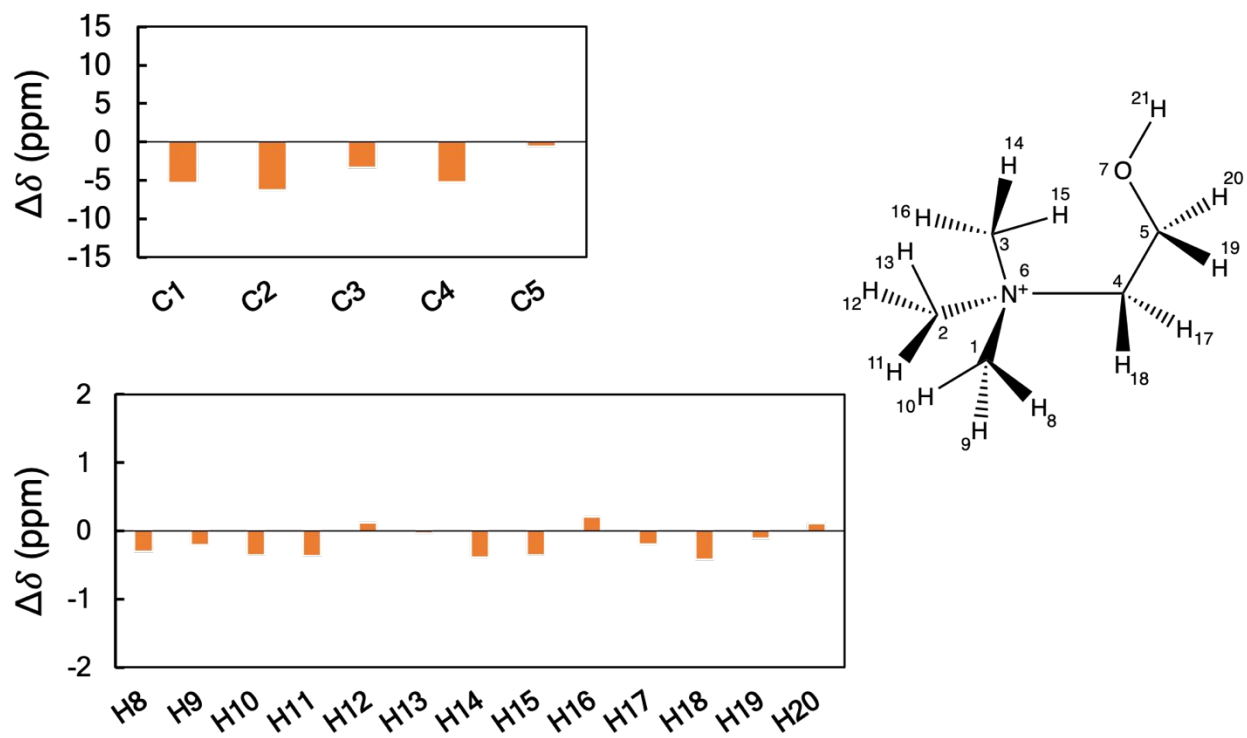

Figure S9. Plots of the differences between the calculated and experimental  $^1\text{H}$  and  $^{13}\text{C}$  NMR chemical shifts of Choline. Shielding constants were computed at the B3LYP/6311G+(2d, p) level of theory and converted to linear scaled reference chemical shifts. Values of chemical shift differences are given in ppm.



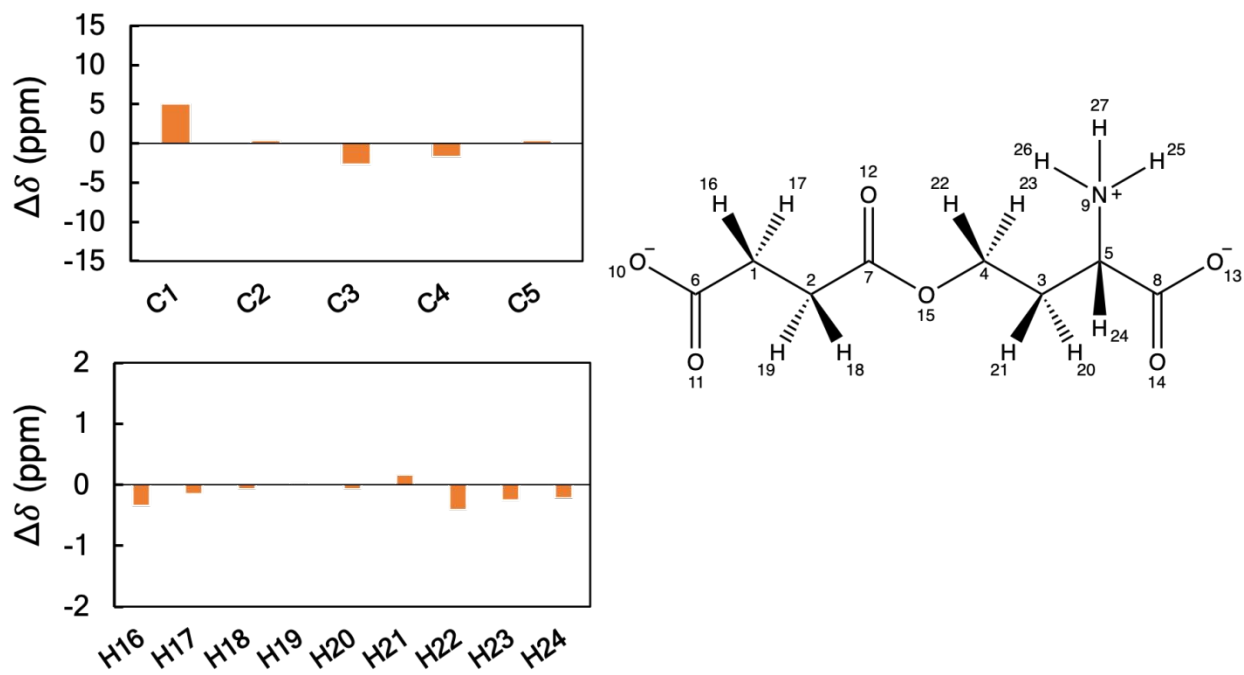

Figure S 10. Plots of the differences between the calculated and experimental  $^1\text{H}$  and  $^{13}\text{C}$  NMR chemical shifts of O-succinyl-L-homoserine (zwitterionic form in the solvent,  $\text{D}_2\text{O}$ ). Shielding constants were computed at the B3LYP/6311G+(2d, p) level of theory and converted to linear scaled reference chemical shifts. Values of chemical shift differences are given in ppm.

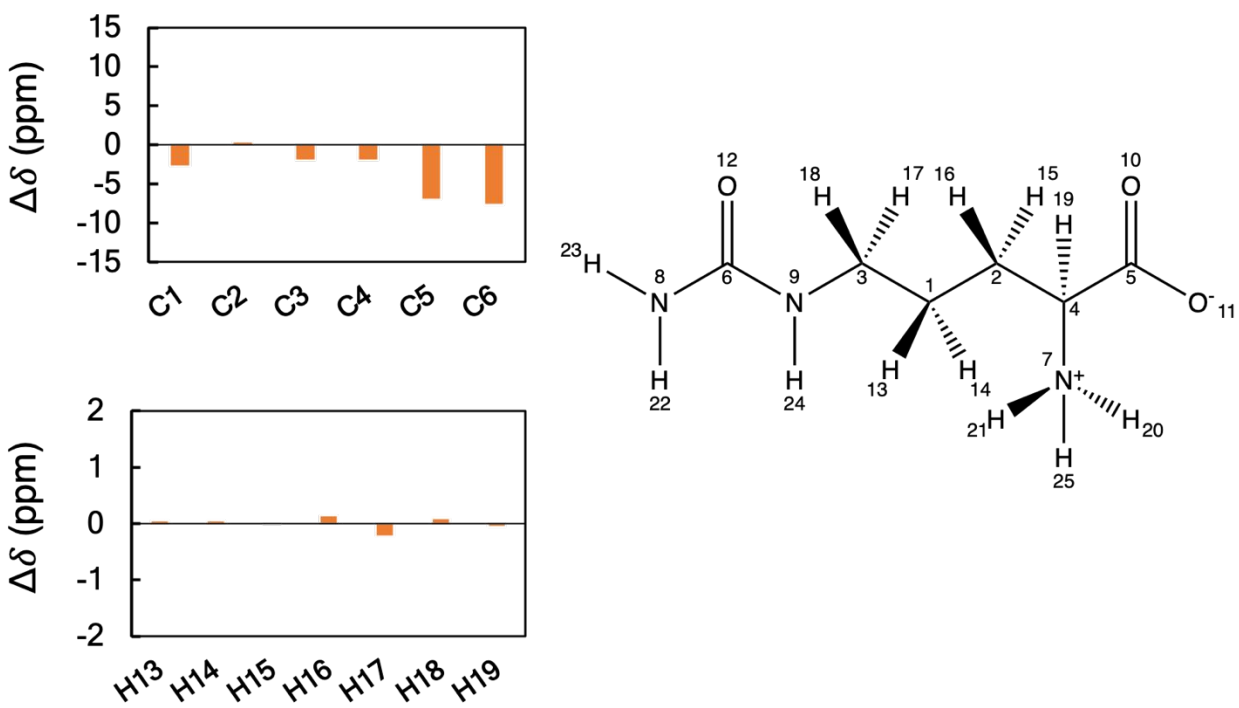

Figure S 11. Plots of the differences between the calculated and experimental  $^1\text{H}$  and  $^{13}\text{C}$  NMR chemical shifts of L-citrulline (zwitterionic form). Shielding constants were computed at the B3LYP/6311G+(2d, p) level of theory and converted to linear scaled reference chemical shifts. Values of chemical shift differences are given in ppm.

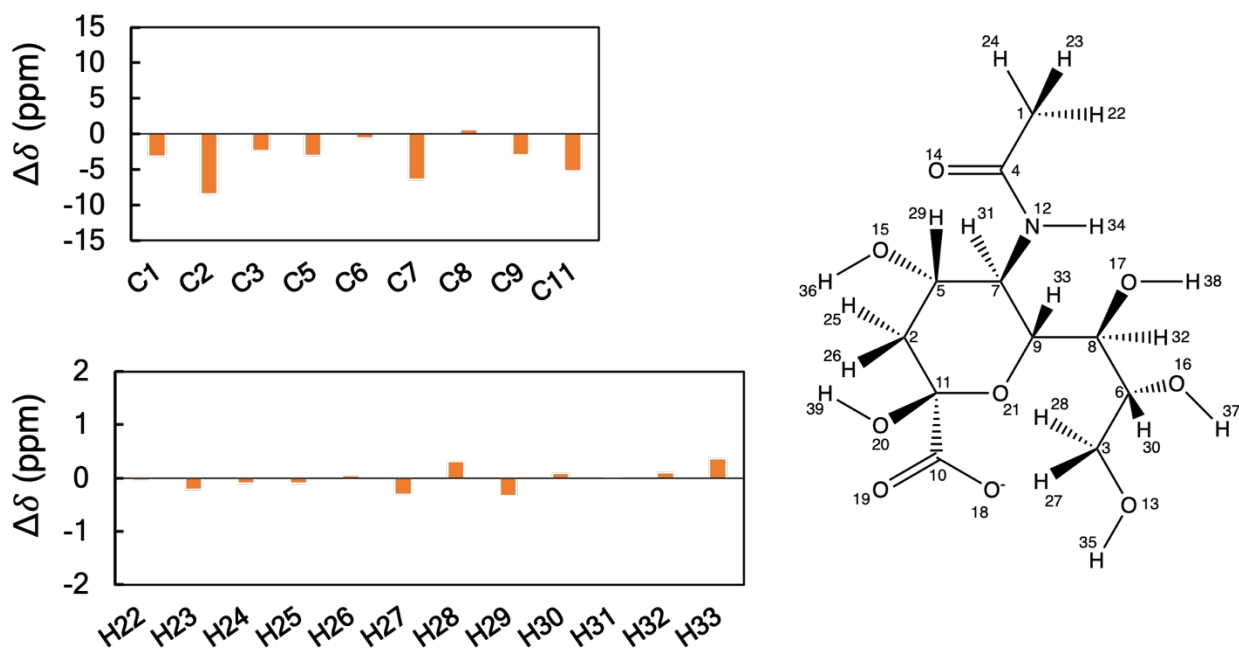

Figure S 12. Plots of the differences between the calculated and experimental  $^1\text{H}$  and  $^{13}\text{C}$  NMR chemical shifts of N-acetylneuraminic-acid (anionic form). Shielding constants were computed at the B3LYP/6311G+(2d, p) level of theory and converted to linear scaled reference chemical shifts. Values of chemical shift differences are given in ppm.

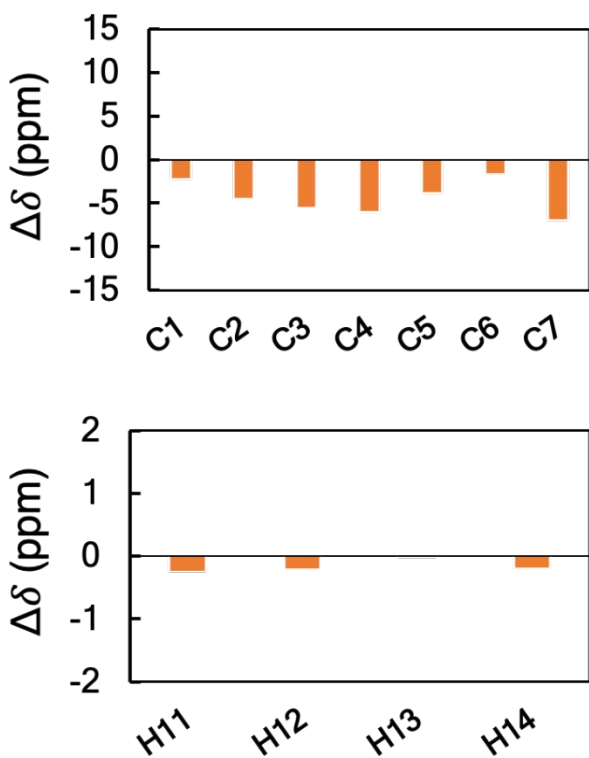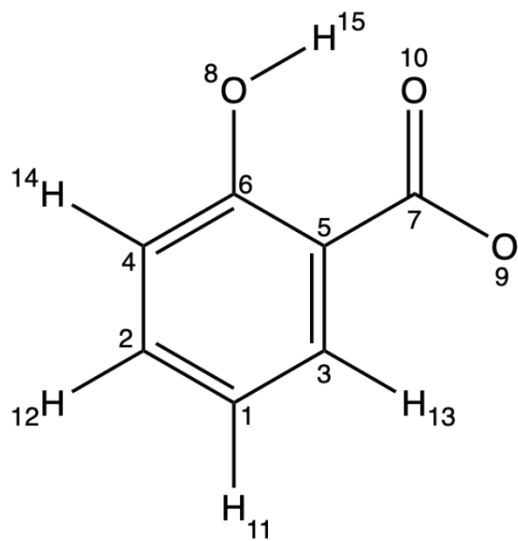

Figure S 13. Plots of the differences between the calculated and experimental  $^1\text{H}$  and  $^{13}\text{C}$  NMR chemical shifts of Salicylate (anionic form). Shielding constants were computed at the B3LYP/6311G+(2d, p) level of theory and converted to linear scaled reference chemical shifts. Values of chemical shift differences are given in ppm.
